# Supplementary material
Source: MDPI journal article supplement (https://www.mdpi.com/2673-4583/12/1/35)
Supplement: s1 [file s1]

Supplementary Material

# Cyclopalladated Compounds with Bulky Phosphine (dppm): Synthesis, Characterization, and X-ray Diffraction <sup>†</sup>

Basma Al Janabi <sup>\*</sup>, Juan M. Ortigueira and Jose Manuel Vila

Department of Inorganic Chemistry, Faculty of Chemistry, University of Santiago de Compostela, Avd. Das Ciencias s/n, 15782 Santiago de Compostela, Spain

<sup>\*</sup> Correspondence: basma.raad@usc.es

<sup>†</sup> Presented at the 26th International Electronic Conference on Synthetic Organic Chemistry, 1–15 November 2022; Available online: <https://sciforum.net/event/ecsoc-26>.

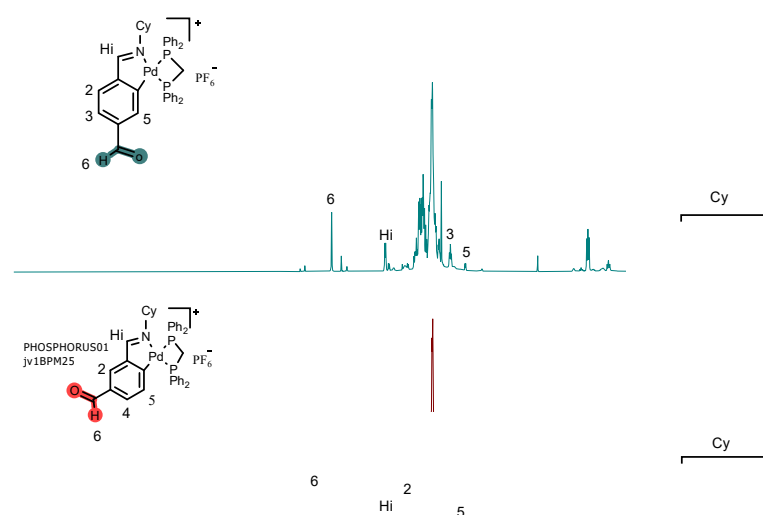

**Citation:** Janabi, B.A.; Ortigueira, J.M.; Vila, J.M. Cyclopalladated Compounds with Bulky Phosphine (dppm): Synthesis, Characterization, and X-ray Diffraction. *Chem. Proc.* **2022**, *12*, 35. <https://doi.org/10.3390/ecsoc-26-13563>

Academic Editor: Julio A. Seijas

Published: 14 November 2022

**Publisher's Note:** MDPI stays neutral with regard to jurisdictional claims in published maps and institutional affiliations.

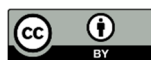

**Copyright:** © 2022 by the authors. Licensee MDPI, Basel, Switzerland. This article is an open access article distributed under the terms and conditions of the Creative Commons Attribution (CC BY) license (<https://creativecommons.org/licenses/by/4.0/>).

**Figure S1.** <sup>1</sup>H NMR of compounds 1a and 1b in CDCl<sub>3</sub>.

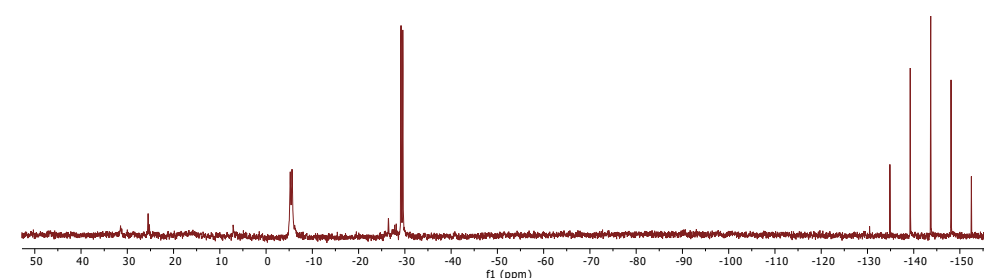

**Figure S2.** <sup>31</sup>P {<sup>1</sup>H} NMR of compound 1a in CDCl<sub>3</sub>.

**Table S1.** Crystal data and structure refinement for 1b.

| Molecular formula.                            | C <sub>39</sub> H <sub>38</sub> F <sub>6</sub> NOP <sub>3</sub> Pd.. |
|-----------------------------------------------|----------------------------------------------------------------------|
| Formula weight.                               | 850.01..                                                             |
| Temperature/K.                                | 100.00..                                                             |
| Crystal system.                               | monoclinic..                                                         |
| Space group.                                  | P2 <sub>1</sub> /n..                                                 |
| a/Å.                                          | 10.0932(6)..                                                         |
| b/Å.                                          | 33.4658(18)..                                                        |
| c/Å.                                          | 11.4492(6)..                                                         |
| α/°.                                          | 90..                                                                 |
| β/°.                                          | 110.580(2)..                                                         |
| γ/°.                                          | 90..                                                                 |
| Volume/Å <sup>3</sup> .                       | 3620.5(3)..                                                          |
| Z.                                            | 4..                                                                  |
| ρ <sub>calc</sub> /g/cm <sup>3</sup> .        | 1.559..                                                              |
| μ/mm <sup>-1</sup> .                          | 0.710..                                                              |
| F(000).                                       | 1728.0..                                                             |
| Crystal size/mm <sup>3</sup> .                | 0.9 × 0.07 × 0.04..                                                  |
| Radiation.                                    | MoKα (λ = 0.71073)..                                                 |
| θ range for data collection/°.                | 4.48 to 56.554..                                                     |
| Index ranges.                                 | −13 ≤ h ≤ 13, −44 ≤ k ≤ 44, −15 ≤ l ≤ 15..                           |
| Reflections collected.                        | 149704..                                                             |
| Independent reflections.                      | 8997 [R <sub>int</sub> = 0.0551, R <sub>sigma</sub> = 0.0214]..      |
| Data/restraints/parameters.                   | 8997/0/461..                                                         |
| Goodness-of-fit on F <sup>2</sup> .           | 1.194..                                                              |
| Final R indexes [I ≥ 2σ (I)].                 | R <sub>1</sub> = 0.0595, wR <sub>2</sub> = 0.1224..                  |
| Final R indexes [all data].                   | R <sub>1</sub> = 0.0661, wR <sub>2</sub> = 0.1255..                  |
| Largest diff. peak/hole / e Å <sup>-3</sup> . | 2.50/−1.83..                                                         |
